# Supplementary material for: The Effect Of microbial Mats In The Decay Of Anurans With Implications For Understanding Taphonomic Processes In The Fossil Record
Source: PubMed Central journal article supplement (PMC5364532; doi:10.1038/srep45160), 2017-03-24
Supplement: srep45160-s1.pdf [file srep45160-s1.pdf]

# THE EFFECT OF MICROBIAL MATS IN THE DECAY OF ANURANS WITH IMPLICATIONS FOR UNDERSTANDING TAPHONOMIC PROCESSES IN THE FOSSIL RECORD

Iniesto M<sup>ab\*</sup>, Villalba I<sup>a</sup>, Buscalioni AD<sup>c</sup>, Guerrero MC<sup>a</sup>, López-Archilla AI<sup>a</sup>

<sup>a</sup>*Department of Ecology, Universidad Autónoma de Madrid, 28049 Madrid, Spain.*

<sup>b</sup>*Biogéosciences UMR6282, CNRS, Université Bourgogne Franche-Comté, 21000 Dijon, France;* <sup>c</sup>*Department of Biology, Universidad Autónoma de Madrid, 28049 Madrid Spain*

*Keywords: brain mineralization, cell preservation, exceptional deposits, Pipidae, soft- tissue fossilization*

\*Correspondence to [miguel.iniesto@gmail.com](mailto:miguel.iniesto@gmail.com)

**Supplementary Figure S1: Sarcophagus formation and coverage of frog carcasses by mats.**

(A) Frog over the mat at the beginning of the experiment. (B) Frog at day 12, with a distinguishable green-darkening under the carcass. (C) Frog partially covered at day 17. (D) Frog trapped by mat at day 28. (E) Thick sarcophagus covering the frog at day 43. (F) At day 60, the frog is embedded in the microbial community.

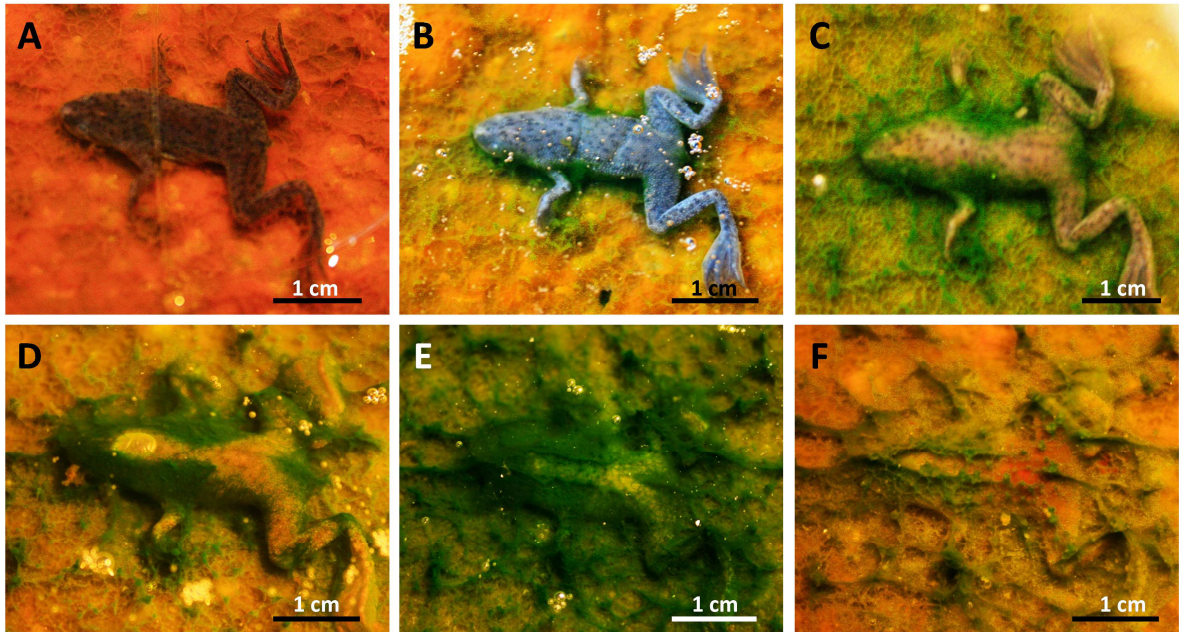

### Supplementary Figure S2: Metric monitoring of bodies in the course of the experiment.

Loss of volume seemed to correlate with the kind of variable measured, being higher in the case of thickness (A), moderate for width (B) and lower for length (C). Data were represented in Scattered Plots by groups (A, B and C) in order to determine the existence of a trend line resumming the variation in volume. (A) Thickness: Data presents two different trend lines, corresponding with *Abdomen thickness* (blue) and *Head Thickness* (green marks). Equations showed that the loss in thickness was higher in those structures with more flesh such as the thigh, while bony structures such as the head exhibit a minor drop. *Thigh thickness* (red marks) did not show any trend line, likely due to the initial swelling. (B) In the case of Width, two trend lines appeared which corresponded with the two variables measured: *Head* (blue) and *Hip* (red) width. It is remarkable that reduction in width is smaller in those structures made mainly by bone such as the head. (C) Length's reduction was more similar between variables, and one single trend line summarized the whole data set (i.e. *Femur* (blue), *Tibia* (red) and *Total Body* (green)). However, reduction was smaller than in other variables, most likely due to bones that are less responsive to decay.

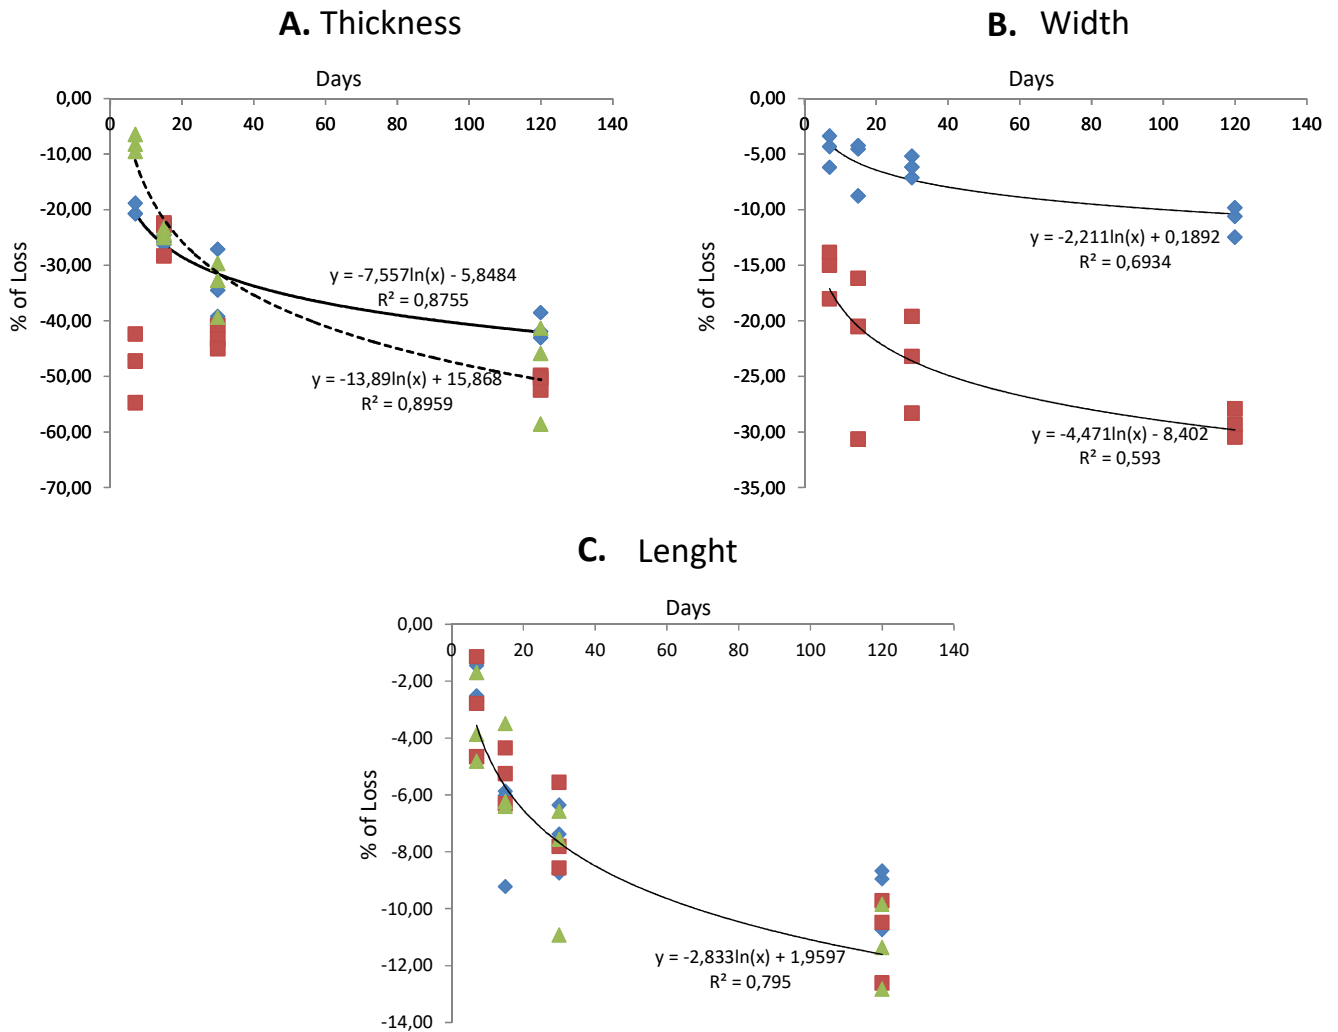

**Supplementary Figure S3: *Hymenochirus boettgeri* after its removal from the microbial sarcophagus at day 120.**

It is noticeable that specimen maintain the complete articulation of limbs and head while being manipulated for measurement. In addition, carcass shows an evident flattening.

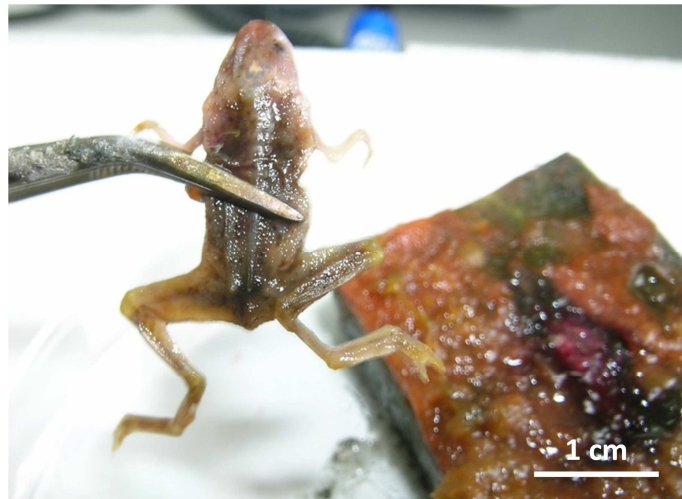

**Supplementary Figure S4: State of articulation and soft tissue preservation of *Hymenochirus boettgeri* inside the microbial sarcophagus.**

(A) Knee of a frog after 120 days in the mat. (B) Detail of the foot at day 120, where nails are still preserved. (C) Knee at day 240. (D) Foot of the frog at day 240 with nails still present. (E) Ankle of the frog at day 540 observed with SEM. The skin is still preserved. Its smoothness let the detection of muscle and tendons beneath it. (F) Section of completely articulated vertebrae (v) with the skin (sk) covering bones. mm: microbial mat; sed: sediment.

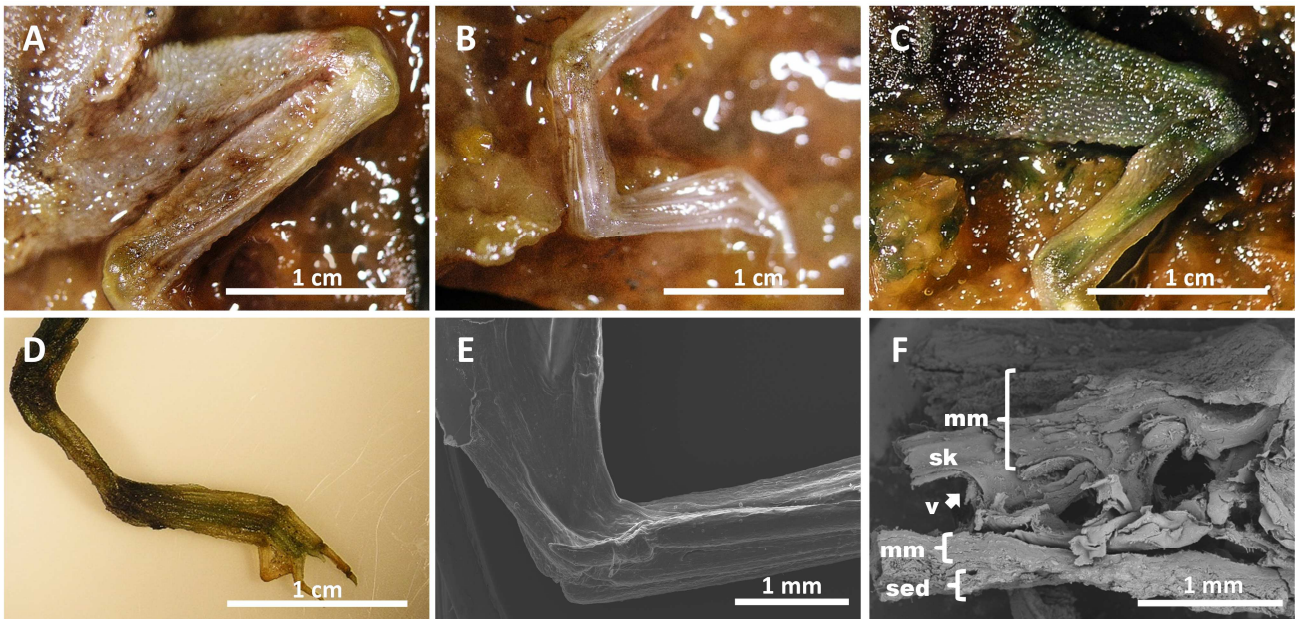

**Supplementary Figure S5: Observation with SEM of the external condition of bones at day 1080 (3 years).**

(A) Section of a vertebra still covered by the skin at day 1080. Where the skin (sk) is absent (the edge is pointed by the arrow), the surface of the bone (b) can be observed. The absence of the skin is a consequence of sectioning. (B) Detail of the femur surface.

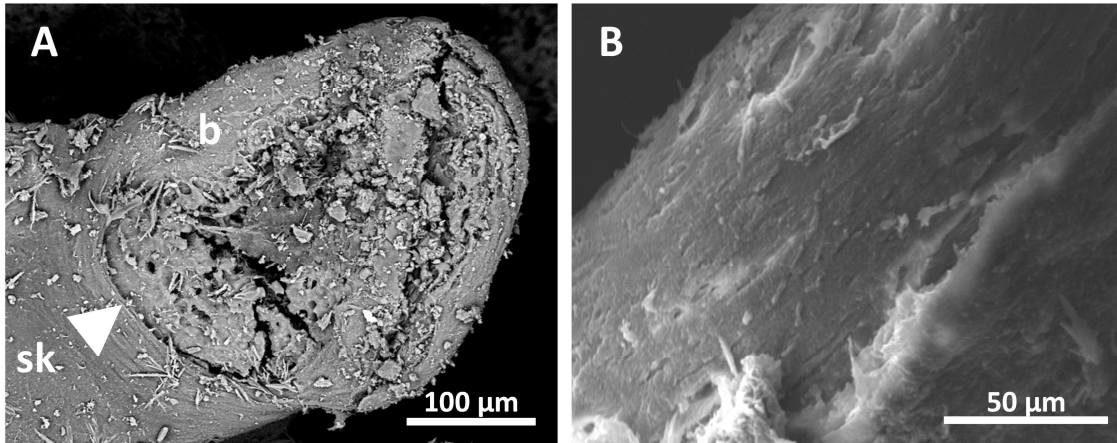

**Supplementary Figure S6: Head of a frog after 120 days inside the sarcophagus.**

Both tegument and bone have become slightly transparent and the midbrain (br) can be observed through them. Despite the time in tank, eyes (e) are still preserved and skin (sk) is not pierced nor broken. In addition, the original pattern of pigmentation (p) is preserved.

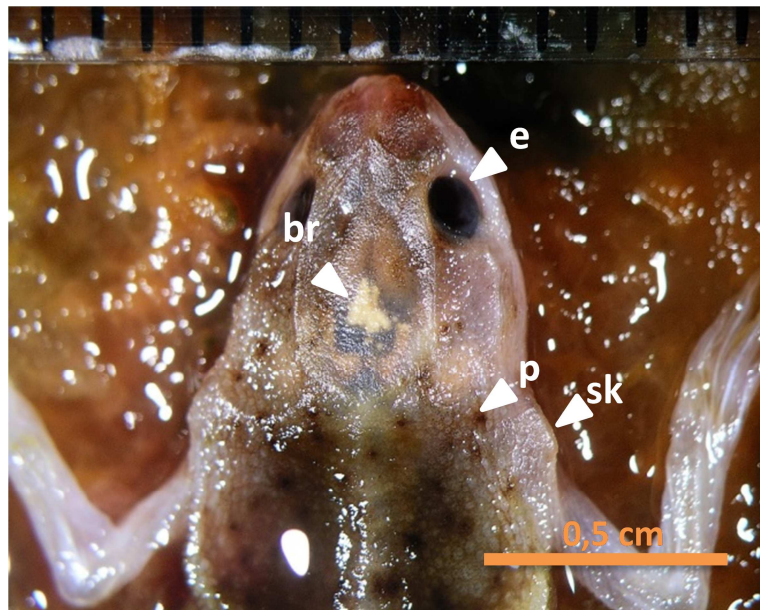

**Supplementary Figure S7: Natural microbial mats recollected at Chiprana Lake (A and B) and microbial mats grown in controlled conditions (C and D).**

(A) Profile section of a natural microbial mat collected at Chiprana Lake. The green line highlights the active zones, where “green, red and black layers” can be found. The predominant populations are cyanobacteria, purple anoxygenic photobacteria, and organo- and lithotrophic bacteria respectively. These strata are built up over former active layers. (B) Pinnacles (arrows) are characteristic structures of mats dominated by cyanobacteria. (C) Stabilized mat after development in laboratory. Its three characteristic layers can be easily observed. (D) Microbial pinnacles are also present in our experimental mats, which were assumed as a sign of maturity and stabilization.

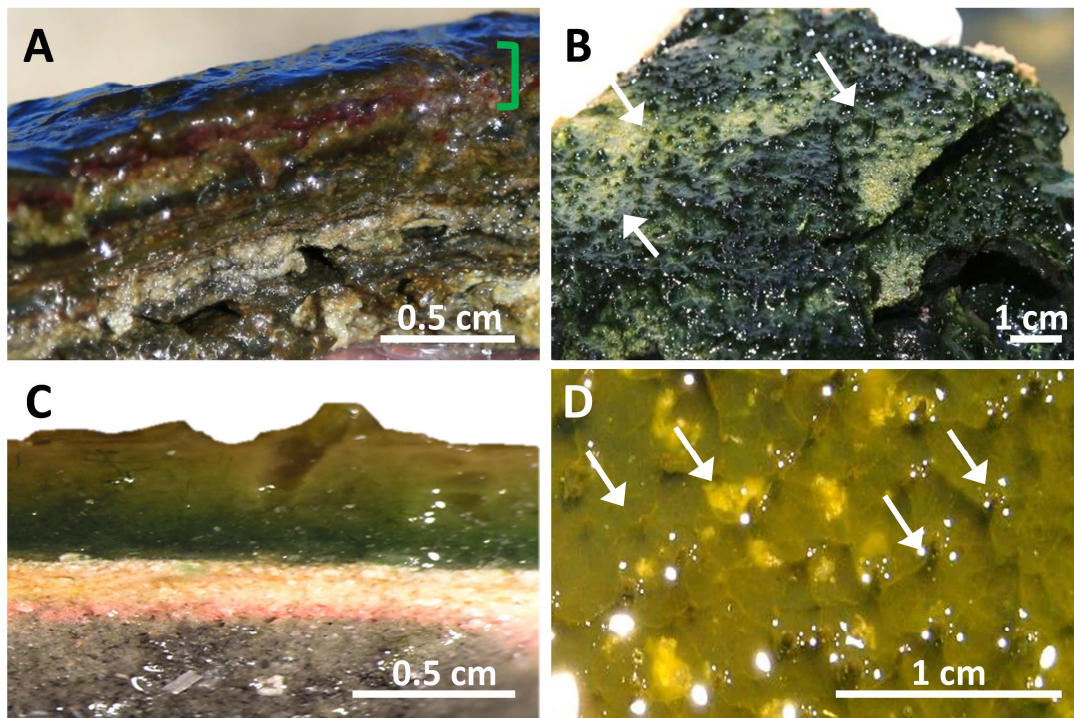



**Supplementary Table S1: Data matrix for Hierarchical Cluster Test based on changes showed by decaying frogs in the course of the experiment.**

Sequence of changes observed during the process of decomposition of frogs in non-mat control sediment and tanks with microbial mats. Initially, both were swelled (first 7 days), although bodies in mat samples recovered slowly their thickness on day 15. The longer persistence of the swelling in mat samples was consequent with the state of the integument. Controls presented at day 15 a loss of skin rugosity (likely pierced), quite disarticulation, and deformation. Thus, the accumulation of gases inside the body was avoided and volume returned to base values. During the swelling-time, the observation of the *linea alba* was difficult. In addition, a thin heterotrophic veil grew rapidly over controls, supporting the statement of the active decay. Mat samples did not show any deformation nor disarticulation along the experiment (Fig. 2 and 4), and a thick layer of mat covered the bodies. These features were ordinal scaled from 1 to 3. 0 = no changes observed; 1 = minor changes observed -i.e. structure is maintained but a few changes can be detected-; 2 = moderate changes; 3 = major changes observed -i.e. element is completely decayed or reduced to disarticulated rests-). T1, T2 and T3 correspond to tanks with microbial mats while C is the control sediment tank.

| Time (days) | Tank | Swelling | Colour | Red colour | <i>Linea alba</i> | EPS | Skin | Articulation |
|-------------|------|----------|--------|------------|-------------------|-----|------|--------------|
| 7           | T1   | 3        | 0      | 3          | 2                 | 0   | 3    | 0            |
| 7           | T2   | 3        | 0      | 3          | 2                 | 0   | 3    | 0            |
| 7           | T3   | 3        | 0      | 3          | 2                 | 0   | 3    | 0            |
| 7           | C    | 3        | 0      | 3          | 2                 | 2   | 3    | 0            |
| 15          | T1   | 2        | 0      | 2          | 3                 | 1   | 2    | 0            |
| 15          | T2   | 3        | 0      | 2          | 3                 | 1   | 3    | 0            |
| 15          | T3   | 2        | 0      | 1          | 2                 | 1   | 2    | 0            |
| 15          | C    | 0        | 0      | 1          | 1                 | 3   | 1    | 1            |
| 30          | T1   | 0        | 0      | 0          | 1                 | 2   | 0    | 0            |
| 30          | T2   | 3        | 0      | 0          | 3                 | 3   | 3    | 0            |
| 30          | T3   | 0        | 0      | 0          | 1                 | 2   | 0    | 0            |
| 30          | C    | 0        | 0      | 0          | 0                 | 3   | 0    | 1            |
| 120         | T1   | 0        | 0      | 1          | 3                 | 3   | 0    | 0            |
| 120         | T2   | 0        | 0      | 0          | 3                 | 3   | 0    | 0            |
| 120         | T3   | 0        | 0      | 0          | 3                 | 3   | 0    | 0            |
| 120         | C    | 0        | 0      | 0          | 3                 | 3   | 0    | 3            |
| 242         | T1   | 0        | 3      | 0          | 3                 | 3   | 0    | 0            |
| 242         | T2   | 0        | 3      | 0          | 3                 | 3   | 0    | 0            |
| 242         | T3   | 0        | 3      | 0          | 3                 | 3   | 0    | 0            |

**Supplementary Table S2: Statistical analysis using the Mann-Witney Wilcoxon test to compare differences size reduction between frogs into microbial mats and control frogs over sediment.**

- Main null hypothesis tested: “decay (i.e. loss of size) in microbial mats did not show differences with control decomposition”
- Other null hypothesis tested: “decay process (i.e. loss of size) did not show differences over time”

Differences are considered significant (in bold) at a p-value < 0.01; df = degrees of freedom; F = Snedecor distribution.

| <b>Factor</b>     | <b>Morphometric parameter</b> | <b>df</b>    | <b>F</b> | <b>Sig.</b>  |
|-------------------|-------------------------------|--------------|----------|--------------|
| <b>Time</b>       | Total Length                  | 3            | 46,548   | <b>0,000</b> |
|                   | Head Width                    | 3            | 14,383   | <b>0,001</b> |
|                   | Hip Width                     | 3            | 7,266    | 0,011        |
|                   | Femur Length                  | 3            | 42,561   | <b>0,000</b> |
|                   | Fibula Length                 | 3            | 28,608   | <b>0,000</b> |
|                   | Head Thickness                | 3            | 40,188   | <b>0,000</b> |
|                   | Abdomen Thickness             | 3            | 29,806   | <b>0,000</b> |
|                   | Thigh Thickness               | 3            | 49,013   | <b>0,000</b> |
|                   | <b>Tank</b>                   | Total Length | 1        | 51,804       |
| Head Width        |                               | 1            | 339,116  | <b>0,000</b> |
| Hip Width         |                               | 1            | 24,049   | <b>0,001</b> |
| Femur Length      |                               | 1            | 87,994   | <b>0,000</b> |
| Fibula Length     |                               | 1            | 44,427   | <b>0,000</b> |
| Head Thickness    |                               | 1            | 129,707  | <b>0,000</b> |
| Abdomen Thickness |                               | 1            | 65,089   | <b>0,000</b> |
| Thigh Thickness   |                               | 1            | 82,093   | <b>0,000</b> |

**Supplementary Table S3: Bonferroni test for time factor showing differences between groups**

Differences are considered significant (in bold) at a p-value < 0.01

| Morphometric parameter | (I) Time 1 | Vs (J) Time 2 | Mean differences (I-J) | Sig.         | Confidence interval (up to 95%) |             |
|------------------------|------------|---------------|------------------------|--------------|---------------------------------|-------------|
|                        |            |               |                        |              | Upper limit                     | Lower limit |
| <b>Total Length</b>    | 7          | 15            | 5,7025(*)              | <b>0,002</b> | 2,5137                          | 8,8913      |
|                        |            | 30            | 8,4025(*)              | <b>0,000</b> | 5,2137                          | 11,5913     |
|                        |            | 120           | 7,0167(*)              | <b>0,001</b> | 3,5724                          | 10,4609     |
|                        | 15         | 7             | -5,7025(*)             | <b>0,002</b> | -8,8913                         | -2,5137     |
|                        |            | 30            | 2,7000                 | 0,111        | -0,4888                         | 5,8888      |
|                        |            | 120           | 1,3142                 | 1,000        | -2,1301                         | 4,7584      |
|                        | 30         | 7             | -8,4025(*)             | <b>0,000</b> | -11,5913                        | -5,2137     |
|                        |            | 15            | -2,7000                | 0,111        | -5,8888                         | 0,4888      |
|                        |            | 120           | -1,3858                | 1,000        | -4,8301                         | 2,0584      |
|                        | 120        | 7             | -7,0167(*)             | <b>0,001</b> | -10,4609                        | -3,5724     |
|                        |            | 15            | -1,3142                | 1,000        | -4,7584                         | 2,1301      |
|                        |            | 30            | 1,3858                 | 1,000        | -2,0584                         | 4,8301      |
| <b>Head Width</b>      | 7          | 15            | 2,1350                 | 0,656        | -1,9885                         | 6,2585      |
|                        |            | 30            | 3,7950                 | 0,075        | -0,3285                         | 7,9185      |
|                        |            | 120           | 2,2542                 | 0,698        | -2,1997                         | 6,7080      |
|                        | 15         | 7             | -2,1350                | 0,656        | -6,2585                         | 1,9885      |
|                        |            | 30            | 1,6600                 | 1,000        | -2,4635                         | 5,7835      |
|                        |            | 120           | 0,1192                 | 1,000        | -4,3347                         | 4,5730      |
|                        | 30         | 7             | -3,7950                | 0,075        | -7,9185                         | 0,3285      |
|                        |            | 15            | -1,6600                | 1,000        | -5,7835                         | 2,4635      |
|                        |            | 120           | -1,5408                | 1,000        | -5,9947                         | 2,9130      |
|                        | 120        | 7             | -2,2542                | 0,698        | -6,7080                         | 2,1997      |
|                        |            | 15            | -0,1192                | 1,000        | -4,5730                         | 4,3347      |
|                        |            | 30            | 1,5408                 | 1,000        | -2,9130                         | 5,9947      |
| <b>Hip Width</b>       | 7          | 15            | 7,4675                 | 0,279        | -3,5732                         | 18,5082     |
|                        |            | 30            | 10,7225                | 0,058        | -0,3182                         | 21,7632     |
|                        |            | 120           | 11,0250                | 0,074        | -0,9003                         | 22,9503     |
|                        | 15         | 7             | -7,4675                | 0,279        | -18,5082                        | 3,5732      |
|                        |            | 30            | 3,2550                 | 1,000        | -7,7857                         | 14,2957     |
|                        |            | 120           | 3,5575                 | 1,000        | -8,3678                         | 15,4828     |
|                        | 30         | 7             | -10,7225               | 0,058        | -21,7632                        | 0,3182      |
|                        |            | 15            | -3,2550                | 1,000        | -14,2957                        | 7,7857      |
|                        |            | 120           | 0,3025                 | 1,000        | -11,6228                        | 12,2278     |

|                          |     |     |             |              |          |          |
|--------------------------|-----|-----|-------------|--------------|----------|----------|
|                          | 120 | 7   | -11,0250    | 0,074        | -22,9503 | 0,9003   |
|                          |     | 15  | -3,5575     | 1,000        | -15,4828 | 8,3678   |
|                          |     | 30  | -0,3025     | 1,000        | -12,2278 | 11,6228  |
| <b>Femur Lenght</b>      | 7   | 15  | 4,4350(*)   | 0,017        | 0,7894   | 8,0806   |
|                          |     | 30  | 8,0650(*)   | <b>0,000</b> | 4,4194   | 11,7106  |
|                          |     | 120 | 7,6275(*)   | <b>0,001</b> | 3,6898   | 11,5652  |
|                          | 15  | 7   | -4,4350(*)  | 0,017        | -8,0806  | -0,7894  |
|                          |     | 30  | 3,6300      | 0,051        | -0,0156  | 7,2756   |
|                          |     | 120 | 3,1925      | 0,135        | -0,7452  | 7,1302   |
|                          | 30  | 7   | -8,0650(*)  | <b>0,000</b> | -11,7106 | -4,4194  |
|                          |     | 15  | -3,6300     | 0,051        | -7,2756  | 0,0156   |
|                          |     | 120 | -0,4375     | 1,000        | -4,3752  | 3,5002   |
|                          | 120 | 7   | -7,6275(*)  | <b>0,001</b> | -11,5652 | -3,6898  |
|                          |     | 15  | -3,1925     | 0,135        | -7,1302  | 0,7452   |
|                          |     | 30  | 0,4375      | 1,000        | -3,5002  | 4,3752   |
| <b>Fibula Lenght</b>     | 7   | 15  | 3,2700      | 0,189        | -1,0997  | 7,6397   |
|                          |     | 30  | 8,1800(*)   | <b>0,001</b> | 3,8103   | 12,5497  |
|                          |     | 120 | 7,4567(*)   | <b>0,003</b> | 2,7368   | 12,1765  |
|                          | 15  | 7   | -3,2700     | 0,189        | -7,6397  | 1,0997   |
|                          |     | 30  | 4,9100(*)   | 0,027        | 0,5403   | 9,2797   |
|                          |     | 120 | 4,1867      | 0,090        | -0,5332  | 8,9065   |
|                          | 30  | 7   | -8,1800(*)  | <b>0,001</b> | -12,5497 | -3,8103  |
|                          |     | 15  | -4,9100(*)  | 0,027        | -9,2797  | -0,5403  |
|                          |     | 120 | -0,7233     | 1,000        | -5,4432  | 3,9965   |
|                          | 120 | 7   | -7,4567(*)  | <b>0,003</b> | -12,1765 | -2,7368  |
|                          |     | 15  | -4,1867     | 0,090        | -8,9065  | 0,5332   |
|                          |     | 30  | 0,7233      | 1,000        | -3,9965  | 5,4432   |
| <b>Head Thickness</b>    | 7   | 15  | 8,6600(*)   | 0,038        | 0,4400   | 16,8800  |
|                          |     | 30  | 18,7100(*)  | <b>0,000</b> | 10,4900  | 26,9300  |
|                          |     | 120 | 17,5283(*)  | <b>0,001</b> | 8,6497   | 26,4070  |
|                          | 15  | 7   | -8,6600(*)  | 0,038        | -16,8800 | -0,4400  |
|                          |     | 30  | 10,0500(*)  | 0,017        | 1,8300   | 18,2700  |
|                          |     | 120 | 8,8683      | 0,050        | -0,0103  | 17,7470  |
|                          | 30  | 7   | -18,7100(*) | <b>0,000</b> | -26,9300 | -10,4900 |
|                          |     | 15  | -10,0500(*) | 0,017        | -18,2700 | -1,8300  |
|                          |     | 120 | -1,1817     | 1,000        | -10,0603 | 7,6970   |
|                          | 120 | 7   | -17,5283(*) | <b>0,001</b> | -26,4070 | -8,6497  |
|                          |     | 15  | -8,8683     | 0,050        | -17,7470 | 0,0103   |
|                          |     | 30  | 1,1817      | 1,000        | -7,6970  | 10,0603  |
| <b>Abdomen Thickness</b> | 7   | 15  | -13,7525(*) | <b>0,005</b> | -22,9598 | -4,5452  |
|                          |     | 30  | 7,0375      | 0,173        | -2,1698  | 16,2448  |
|                          |     | 120 | 5,0133      | 0,705        | -4,9317  | 14,9583  |
|                          | 15  | 7   | 13,7525(*)  | <b>0,005</b> | 4,5452   | 22,9598  |

|                            |     |     |             |              |          |          |
|----------------------------|-----|-----|-------------|--------------|----------|----------|
|                            |     | 30  | 20,7900(*)  | <b>0,000</b> | 11,5827  | 29,9973  |
|                            |     | 120 | 18,7658(*)  | <b>0,001</b> | 8,8208   | 28,7108  |
|                            | 30  | 7   | -7,0375     | 0,173        | -16,2448 | 2,1698   |
|                            |     | 15  | -20,7900(*) | <b>0,000</b> | -29,9973 | -11,5827 |
|                            |     | 120 | -2,0242     | 1,000        | -11,9692 | 7,9208   |
|                            | 120 | 7   | -5,0133     | 0,705        | -14,9583 | 4,9317   |
|                            |     | 15  | -18,7658(*) | <b>0,001</b> | -28,7108 | -8,8208  |
|                            |     | 30  | 2,0242      | 1,000        | -7,9208  | 11,9692  |
| <b>Thigh<br/>Thickness</b> | 7   | 15  | 22,4800(*)  | <b>0,002</b> | 9,7028   | 35,2572  |
|                            |     | 30  | 32,0350(*)  | <b>0,000</b> | 19,2578  | 44,8122  |
|                            |     | 120 | 36,8792(*)  | <b>0,000</b> | 23,0782  | 50,6802  |
|                            | 15  | 7   | -22,4800(*) | <b>0,002</b> | -35,2572 | -9,7028  |
|                            |     | 30  | 9,5550      | 0,189        | -3,2222  | 22,3322  |
|                            |     | 120 | 14,3992(*)  | 0,040        | 0,5982   | 28,2002  |
|                            | 30  | 7   | -32,0350(*) | <b>0,000</b> | -44,8122 | -19,2578 |
|                            |     | 15  | -9,5550     | 0,189        | -22,3322 | 3,2222   |
|                            |     | 120 | 4,8442      | 1,000        | -8,9568  | 18,6452  |
|                            | 120 | 7   | -36,8792(*) | <b>0,000</b> | -50,6802 | -23,0782 |
|                            |     | 15  | -14,3992(*) | 0,040        | -28,2002 | -0,5982  |
|                            |     | 30  | -4,8442     | 1,000        | -18,6452 | 8,9568   |
